1 **The impact of a conditional financial incentive on linkage to HIV care: Findings from the HITS**  
2 **cluster randomized clinical trial in rural South Africa**

3 Hae-Young Kim<sup>1,2</sup>, Maxime Inghels<sup>3,4</sup>, Thulile Mathenjwa<sup>2</sup>, Maryam Shahmanesh<sup>2,5</sup>, Janet Seeley<sup>2,6</sup>,  
4 Phillippa Matthews<sup>2</sup>, Nuala McGrath<sup>2,8,18</sup>, Oluwafemi Adeagbo<sup>9,10</sup>, Dickman Gareta,<sup>2</sup> H. Manisha  
5 Yapa<sup>11,12</sup>, Thembelihle Zuma<sup>2</sup>, Adrian Dobra<sup>13</sup>, Till Bärnighausen<sup>15</sup>, Frank Tanser<sup>2,16,17,18</sup>

6

7 <sup>1</sup> New York University School of Medicine, New York, USA

8 <sup>2</sup> Africa Health Research Institute, KwaZulu-Natal, South Africa

9 <sup>3</sup> Lincoln International Institute for Rural Health, University of Lincoln, Lincoln, United Kingdom

10 <sup>4</sup> Centre Population et Développement (UMR 196 Paris Descartes – IRD), SageSud (ERL INSERM  
11 1244), Institut de Recherche pour le Développement, Paris, France

12 <sup>5</sup> Institute for Global Health, University College London, London, United Kingdom

13 <sup>6</sup> London School of Hygiene and Tropical Medicine, London, United Kingdom

14 <sup>7</sup> University of Glasgow, Glasgow, United Kingdom

15 <sup>8</sup> University of Southampton, Southampton, United Kingdom

16 <sup>9</sup> University of Johannesburg, Johannesburg, South Africa

17 <sup>10</sup> College of Public Health, University of Iowa, USA

18 <sup>11</sup> The Kirby Institute, University of New South Wales Sydney, Sydney, Australia

19 <sup>12</sup> Sydney Infectious Diseases Institute, University of Sydney, Sydney, Australia

20 <sup>13</sup> University of Washington, Washington, USA

21 <sup>14</sup> University College London Interaction Centre, University College London, London, United  
22 Kingdom

23 <sup>15</sup> Heidelberg Institute of Global Health, University of Heidelberg, Heidelberg, Germany

24 <sup>16</sup> Centre for Epidemic Response and Innovation, School for Data Science and  
25 Computational Thinking, Stellenbosch University, Stellenbosch, South Africa

26

27 <sup>17</sup> South African DSI-NRF Centre of Excellence in Epidemiological Modelling and Analysis  
28 (SACEMA), Stellenbosch University, Stellenbosch, South Africa

29

30 <sup>18</sup> School of Nursing and Public Health, University of KwaZulu-Natal, Durban, South Africa

31 Corresponding Author: Hae-Young Kim, PhD, 227 East 30<sup>th</sup> Street, New York, NY, USA; e-mail  
32 address: hae-young.kim@nyulangone.org

33 Keywords: Linkage to HIV care, financial incentives, randomized controlled trial, South Africa

34 Word count:

35 Abstract: 346/350

36 Main text: 3,212/3500

37 **Running Head:** Increasing linkage to HIV care using conditional financial incentives in rural South  
38 Africa

39 **Competing interests**

40 The authors declare no conflicts of interest.

41 **Authors' contributions**

42 **Oluwafemi Adeagbo:** Conceptualization, Methodology, Software, Writing – Review & Editing. **Till**

43 **Bärnighausen:** Conceptualization, Funding acquisition, Investigation, Methodology, Software, Supervision,

44 Writing – Review & Editing. **Adrian Dobra:** Conceptualization, Formal analysis, Methodology, Writing –

45 Review & Editing. **Dickman Gareta:** Data curation, Software, Writing – Review & Editing.

46 **Maxime Inghels:** Conceptualization, Data curation, Formal analysis, Methodology, Validation, Writing –

47 Review & Editing. **Hae-Young Kim:** Conceptualization, Data curation, Formal analysis, Methodology,

48 Writing – Original Draft Preparation. **Thulile Mathenjwa:** Conceptualization, Investigation, Methodology,

49 Project Administration, Software, Writing – Review & Editing. **Phillippa Matthews:** Conceptualization,

50 Funding acquisition, Methodology, Software, Writing – Review & Editing. **Nuala McGrath:**

51 Conceptualization, Funding acquisition, Methodology, Software, Writing – Review & Editing. **Jane Seeley:**

52 Conceptualization, Funding acquisition, Methodology, Software, Writing – Review & Editing. **Maryam**

53 **Shahmanesh:** Conceptualization, Funding acquisition, Methodology, Software, Writing – Review & Editing.

54 **Frank Tanser:** Conceptualization, Funding acquisition, Investigation, Methodology, Software, Supervision,

55 Writing – Review & Editing. **H Manisha Yapa:** Conceptualization, Methodology, Writing – Review &

56 Editing. **Thembelihle Zuma:** Conceptualization, Methodology, Writing – Review & Editing.

57 **Acknowledgement**

58 We thank community members for their continued support and participation in the Africa Health  
59 Research Institute's Health and Demographic Surveillance System (HDSS), and the AHRI population,  
60 clinical, laboratory and data management teams – especially, Kobus Herbst, Thobeka Mngomezulu,  
61 Siyabonga Nxumalo, Keabetswe Dikgale, Jaco Dreyer, Theresa Smit, Sphephelo Dlamini and his team,  
62 Sithembiso Luthuli, and Patrick Gabela.

63

64 **Funding:** The research is funded by the National Institute of Allergy and Infectious Diseases (NIAID)  
65 of the National Institutes of Health (NIH) under Award Number R01AI124389 (PIs: FT and TB).  
66 EPIC-HIV development was supported by the Engineering and Physical Sciences Research Council  
67 (EPSRC) Interdisciplinary Research Collaboration (IRC) Early-warning Sensing Systems for  
68 Infectious Diseases (i-sense) EP/K031953/1 and MRC MR/P024378/1. FT and TB are supported by  
69 the Eunice Kennedy Shriver National Institute of Child Health and Human Development (NICHD)  
70 (Award # R01-HD084233), and FT is additionally supported by the National Institute of Mental Health  
71 (NIMH) (Award # R01MH131480). NM is a recipient of an NIHR Research Professorship award (RP-  
72 2017-08-ST2-008). The Africa Health Research Institute's HDSS is funded by the Wellcome Trust  
73 (201433/A/16/A), and the South Africa Population Research Infrastructure Network (funded by the  
74 South African Department of Science and Technology and hosted by the South African Medical  
75 Research Council). The content is solely the responsibility of the authors and does not necessarily  
76 represent the official views of the funding bodies.

77

78 **Role of the funding source**

79 The funders of the study had no role in study design, data collection, data analysis, data interpretation,  
80 or writing of the article.

81

82 **Data availability:** The data underlying the results presented in the study are available from the AHRI  
83 Data Repository (<https://data.ahri.org>) for researchers who meet the criteria for access to confidential

84 data and sign on the agreement according to the AHRI's protocol for data sharing. The authors confirm  
85 they did not have any special access or privileges that others would not have.

86

## 87 **Abstract**

88 **Introduction:** HIV elimination requires innovative approaches to ensure testing and immediate  
89 treatment provision. We investigated the effectiveness of conditional financial incentives on increasing  
90 linkage to HIV care in a 2x2 factorial cluster randomized controlled trial -Home-Based Intervention  
91 to Test and Start (HITS) - in rural South Africa.

92 **Methods:** Of 45 communities in uMkhanyakude, KwaZulu-Natal, 16 communities were randomly  
93 assigned to the arms to receive financial incentives for home-based HIV counseling and testing  
94 (HBHCT) and linkage to care within 6 weeks (R50 [US\$3] food voucher each) and 29 communities  
95 to the arms without financial incentives. We examined linkage to care (i.e., initiation or resumption of  
96 antiretroviral therapy after >3 months of care interruption) at local clinics within 6 weeks of a home  
97 visit, the eligibility period to receive the second financial incentive. Linkage to care was ascertained  
98 from individual clinical records. Intention-to-treat analysis (ITT) was performed using modified  
99 Poisson regression with adjustment for receiving another intervention (i.e., male-targeted HIV-specific  
100 decision support app) and clustering of standard errors at the community level.

101 **Results:** Among 13,894 eligible men (i.e.,  $\geq 15$  years and resident in the 45 communities), 20.7%  
102 received HBHCT, which resulted in 122 HIV-positive tests. Of these, 27 linked to care within 6 weeks  
103 of HBHCT. Additionally, of eligible men who did not receive HBHCT, 66 linked to care. In the ITT  
104 analysis, the proportion of linkage to care among men did not differ in the arms which received  
105 financial incentives and those without financial incentives (adjusted Risk Ratio [aRR]=0.78, 95% CI:  
106 0.51-1.21). Among 19,884 eligible women, 29.1% received HBHCT, which resulted in 375 HIV-  
107 positive tests. Of these, 75 linked to care. Among eligible women who did not receive HBHCT, 121  
108 linked to care within 6 weeks. Women in the financial incentive arms had a significantly higher  
109 probability of linkage to care, compared to those in the arms without financial incentives (aRR=1.50;  
110 95% CI: 1.03-2.21).

111 **Conclusion:** While a small once-off financial incentive did not increase linkage to care among men  
112 during the eligibility period of 6 weeks, it significantly improved linkage to care among women over  
113 the same period.

114 Clinical Trial Number: ClinicalTrials.gov # NCT03757104

115

116

## 117 INTRODUCTION

118 Antiretroviral therapy (ART) has dramatically reduced HIV-related morbidity and mortality as well as  
119 the risk of HIV transmission among people living with HIV (PLWH).<sup>1-7</sup> To maximize the benefits of  
120 ART, it is critical to diagnose PLWH early, link and retain them in care. However, a substantial  
121 proportion of PLWH remains undiagnosed or not linked to care. In South Africa, which is home to  
122 over 7 million PLWH and 210,000 new infections in 2021, 94% of PLWH knew their HIV status, but  
123 only 74% of them linked to care and received ART.<sup>8</sup>

124  
125 Home-based HIV counseling and testing (HBHCT) is an effective way to reach the undiagnosed or  
126 hard-to-reach population in rural<sup>9-13</sup> and urban<sup>12</sup> settings in sub-Saharan Africa (SSA).<sup>14</sup> HBHCT is  
127 highly acceptable and has increased the uptake of HIV testing in SSA.<sup>14</sup> However, several studies have  
128 shown that linkage to care following HBHCT remains suboptimal,<sup>15</sup> particularly among newly  
129 diagnosed individuals.<sup>10,16</sup> For example, in HPTN 071 (PopART), a community-randomized trial of a  
130 combination HIV prevention package, only 36% and 66% of newly diagnosed individuals initiated  
131 ART by 3 and 12 months, respectively.<sup>17</sup> Especially, men are more likely to delay their linkage to care  
132 after diagnosis,<sup>17,18</sup> due to barriers such as perceptions about the treatment, social stigma or gender  
133 norms.<sup>16,19</sup>

134  
135 Various interventions have been implemented to improve linkage to care in SSA, including the  
136 provision of financial incentives.<sup>20,21</sup> Conditional financial incentives had shown mixed results in  
137 increasing linkage to care. Several studies conducted in SSA have reported that financial incentives,  
138 when combined with intervention strategies such as point-of-care testing, did not significantly improve  
139 linkage to care.<sup>22-30</sup> However, to our knowledge, no study has examined the impact of multi-stage  
140 financial incentives and their impact on linkage to care following HBHCT in SSA.

141  
142 We conducted a 2x2 factorial cluster randomized controlled trial -Home-Based Intervention to Test  
143 and Start (HITS) - in 45 rural communities in uMkhanyakude district of KwaZulu Natal, South Africa.

144 We previously reported findings on the impact of conditional financial incentives and the app-based  
145 system for informed decision-making, EPIC-HIV, on the uptake of HBHCT.<sup>31,32</sup> Here, we report the  
146 impact of financial incentive on linkage to care among men and women.

147

## 148 **METHODS**

### 149 **Setting**

150 The trial was nested within AHRI's Health and Demographic Surveillance System (HDSS) and  
151 facilitated linkage to care in uMkhanyakude district of Northern KwaZulu Natal.<sup>33</sup> The estimated HIV  
152 prevalence in the study area was estimated as 19% in men and 40% in women in 2018.<sup>1</sup> Since 2003,  
153 AHRI has conducted population-based HIV surveillance within AHRI's HDSS. The HIV surveillance  
154 is annually conducted among all residents aged  $\geq 15$  years to collect data on sexual behavior and general  
155 health as well as dried blood spots (DBS) samples for anonymized HIV testing after obtaining  
156 informed consent.<sup>34,35</sup> Since 2017, rapid HIV testing with immediate results has been offered as part of  
157 the HIV surveillance during household visits.

158

### 159 **Trial Design**

160 Between February and December 2018, we implemented a 2x2 factorial cluster-randomized trial  
161 among a population of 37,028 residents aged  $\geq 15$  years across 45 clusters within AHRI's ongoing  
162 population-based annual HIV testing platform (Figure 1).<sup>36</sup> The trial offered two interventions:  
163 financial incentives and a male-targeted app-based system for informed decision-making, called EPIC-  
164 HIV (Empowering People through Informed Choices for HIV). Over the entire study duration, 8  
165 communities received only financial incentives, 8 communities received only EPIC-HIV, 8  
166 communities received both interventions, and 21 communities received standard of care. While both  
167 males and females were eligible to receive financial incentives, only males were eligible to receive  
168 EPIC-HIV. Randomization was conducted to ensure balance across the arms using stratified sampling  
169 at the community level based on the HIV incidence among young females aged 15-30 years. The  
170 implementation and acceptance of the HITS intervention were evaluated using a process evaluation,

171 utilizing post-intervention satisfaction surveys<sup>37</sup> as well as focus group discussion and in-depth  
172 interviews among study participants, fieldworkers, and health professionals. Results of the process  
173 evaluation have been published elsewhere.<sup>38</sup> The trial was registered at the National Institute of Health  
174 (ClinicalTrials.gov # NCT03757104), and the complete trial protocol was published elsewhere.<sup>36</sup>

175

#### 176 **Standard of care for HBHCT and linkage to care**

177 As part of the AHRI population-based annual HIV surveillance, field workers who are trained in HIV  
178 counselling and testing conduct rapid point-of-care HIV tests with immediate results in accordance  
179 with the South African national guidelines. When individuals are not available during the initial contact  
180 attempt to complete the HIV surveillance, they are revisited twice more during normal working hours  
181 within the same week. Subsequently, a tracking team attempts to contact participants and make three  
182 additional home visits during evenings or weekends before considering them as non-contact.  
183 Participants found to be HIV-positive are encouraged to link to care within 7-10 days of the HIV test  
184 date and are offered a referral slip for an appointment to receive HIV care at one of the 10 local clinics.  
185 In these clinics, AHRI has set up a system to record clinic visits and reasons for attendance for all  
186 consenting individuals presenting at the clinics. Individuals who consent for facilitated linkage and  
187 have not linked to care within two weeks of the HIV test date receive a single Short Message Service  
188 (SMS) message as a reminder. If these individuals do not link to care within an additional two weeks,  
189 a trained nurse contacts them by telephone to discuss any concerns and encourages them to link to care.

190

#### 191 **Interventions**

192 The interventions were delivered in a two-stage scheme for HIV testing and linkage to care. In the  
193 arms receiving financial incentives, participants were offered a R50 (US ~\$3) food voucher for a local  
194 supermarket conditional on their participation in rapid HIV testing. Second, participants who tested  
195 HIV-positive were offered another R50 food voucher if they visited any of the 10 primary health clinics  
196 in the AHRI HIV surveillance area to seek HIV treatment within 6 weeks of the positive HIV test date.



197 The male-targeted HIV-specific decision support application was implemented and offered via a tablet  
198 and offered in two versions (EPIC-HIV 1 and EPIC-HIV 2). EPIC-HIV 1 was provided to men prior  
199 to the offer of HIV testing. It aimed to support their decision-making regarding whether to take a rapid  
200 HIV test or not and to facilitate linkage to care if tested HIV-positive. Participants who did not link to  
201 HIV care within a month of a positive HIV test were revisited by a study tracker and offered the second  
202 application (EPIC-HIV 2), which is designed to address barriers to seeking HIV treatment and  
203 encourage them to link to HIV care. The application development is described in detail elsewhere.<sup>36,39</sup>  
204 Individuals who did not receive home-based HIV testing, including those who were not contacted or  
205 declined annual HIV testing, were not eligible to receive the financial incentive upon linkage to care.

206

## 207 **Outcomes**

208 In this study, we report the proportion of individuals diagnosed with HIV following HBHCT and the  
209 probability of linkage to care within 6 weeks after HBHCT, the eligibility period to receive the second  
210 financial incentive. The conditional financial incentive for linkage to care was only provided if a person  
211 tested HIV-positive at HBHCT linked to care within 6 weeks after HBHCT. Linkage to care was  
212 defined as ART initiation or resumption and captured using two sources of data collection, covering  
213 all study participants including those who were never contacted or declined annual HIV testing during  
214 the study visit. First, clinical research assistants stationed at 10 local clinics within the surveillance  
215 area and recorded clinical information for all visiting patients, including clinic visit dates, reasons for  
216 clinic attendance, and participation in the AHRI HDSS. This information was captured into an  
217 electronic data collection system called AHRILink, where the database for each of the 10 clinics was  
218 linked to a central database through an ongoing replication process. Second, through a memorandum  
219 of agreement with the South African Department of Health, the AHRI population-based program is  
220 linked with the clinical records of patients registered in the local public HIV Treatment and Care  
221 Programme at the Hlabisa district hospital and 17 primary health care clinics within the Hlabisa health  
222 sub-district using the TIER.Net. TIER.Net is a three-tiered electronic patient management system used  
223 in public clinics in South Africa for monitoring and evaluating HIV care and treatment for all patients

224 receiving ART. The TIER.Net system was implemented in uMkhanyakude district in 2013. Patient  
225 records from all visits prior to 2013 were back-captured into the system from AHRI's previous HIV  
226 care clinical database between 2004 and 2012.<sup>40</sup> The TIER.Net database is linked with the AHRI  
227 surveillance database based on personal identifiers using algorithms developed at AHRI. All patient  
228 clinic visits for ART initiation and follow-up after the home-based study visits were confirmed through  
229 Tier.Net and AHRILink. ART initiation was defined as being newly prescribed ART without any prior  
230 record of ART initiation. ART resumption was defined as re-initiating ART after >90 days of care  
231 interruption as ascertained through AHRILink and/or TIER.Net.

232

### 233 **Statistical methods**

234 The primary analysis was conducted using the intent-to-treat (ITT) analysis for all men and women  
235 randomized at the community level. We examined the outcome as a binary variable using modified  
236 Poisson regression, adjusting for clustering of standard errors at the community level. All outcomes  
237 among males were also adjusted for the provision of the EPIC intervention. We estimated the time to  
238 linkage to care within 6 weeks for each intervention arm using Kaplan-Meier survival curves. The log  
239 rank test was used to compare the differences in linkage to care in the arms with and without financial  
240 incentives. All analyses were conducted among men and women, separately, using STATA 15.1  
241 (StataCorp) and R 4.0.3.

242

### 243 **Ethics statement**

244 The study protocols for the AHRI's population-based HIV testing platform and HITS intervention  
245 were approved by the Biomedical Research Ethics Committee of the University of KwaZulu-Natal  
246 (BE290/16 and BFC398/16).<sup>36</sup> Permission for the trial was obtained from the KwaZulu-Natal  
247 Department of Health, South Africa. Participation in the HIV surveillance and HITS trial is completely  
248 voluntary. Individuals may choose not to answer and/or participate in any component of the HIV  
249 surveillance and to withdraw at any time. Written informed consent was sought from individuals aged

250 ≥ 18 years, and parental or guardian consent with child assent for individuals of 15-17 years old were  
251 obtained.

252

## 253 **RESULTS**

### 254 **Participants and recruitment flow**

255 All 15,485 men living in the 45 clusters in the study area were initially considered eligible for the trial.  
256 Study participants were enrolled between February 2018 and December 2018. Of these, 1,591 died or  
257 out-migrated. Of the remaining 13,894 eligible men, 4,244 (30.6%) could not be contacted (mainly  
258 due to absence at the time of HIV testing despite several attempts to follow up), 4,773 (34.4%) declined  
259 to participate in the annual population-based HIV testing in 2018, and 453 (3.3%) self-reported being  
260 on ART, thus resulting in 4,424 (31.8% of the resident population) who participated in the population-  
261 based HIV testing (Figure 1). The flow diagram through each stage of the HITS trial by the 2x2  
262 intervention arms among men is available in Figure S1. Randomization successfully achieved balance  
263 regarding HIV prevalence and sociodemographic variables in the arms with vs. without financial  
264 incentives, except for the area of residency (Table 1).

265

266 Of 21,545 women residing in the 45 clusters within the study area initially considered eligible for  
267 inclusion, 1,661 died or out-migrated. Of the remaining 19,884 eligible women, 3,944 (19.8%) could  
268 not be contacted, 5,136 (25.8%) declined to participate in the annual population-based HIV testing in  
269 2018, and 2,129 (10.7%) self-reported being on ART, thus resulting in 8,675 (31.9% of the resident  
270 population) who participated in the population-based HIV testing (Figure 1). Similar to men,  
271 randomization achieved balance in respect of HIV prevalence and sociodemographic variables in the  
272 arms with vs. without financial incentives, except for the area of residency (Table 1).

273

### 274 **HIV positive diagnosis by intervention arms among men and women**

275 Among all 13,894 men ≥15 years resident in the 45 communities in 2018, the overall uptake of home-  
276 based HIV testing was 26.9% (1246/4624) in the financial incentive arms, and 17.5% (1621/9270) in

277 the arms without the financial incentives. Of 20.6% men (n=2,867) who received HBHCT, 122 tested  
278 positive for HIV. In the ITT analysis, 1.4% (63/4624) in the financial incentive arms and 0.6%  
279 (59/9270) in the arms without the financial incentives tested HIV-positive using rapid HIV tests. The  
280 probability of a positive HIV diagnosis via HBHCT was about two times higher in the financial  
281 incentive arms among men, adjusting for the provision of the EPIC-HIV [adjusted risk ratio  
282 (aRR)=2.11, 95% CI: 1.36-3.28, p=0.001].

283

284 Among all 19,884 women  $\geq 15$  years living in the 45 communities, the overall testing coverage was  
285 36.9% (2372/6433) in the financial incentive arms and 25.4% (3423/13451) in the arms without  
286 financial incentives. In the ITT analysis, compared to women in the arms without the financial  
287 incentives, the probability of uptake of HIV testing was 45% higher in the financial incentive arms  
288 (RR=1.45, 95% CI: 1.26-1.67, p<0.001). Of 5,795 (29.1%) who received HBHCT, 375 tested positive  
289 for HIV, including 60 (16.0%) women with previously unknown HIV status and 261 (69.6%) women  
290 newly diagnosed through the trial. Overall, 3.4% (217/6433) in the financial incentive arms tested  
291 HIV-positive, compared to 1.2% (158/13451) in the arms without financial incentives. The probability  
292 of a positive HIV diagnosis using home-based rapid HIV testing was 2.87 times higher among women  
293 in the financial incentive arms compared to the arms without the financial incentives (95% CI: 2.19-  
294 3.76, p<0.001).

295

### 296 **Effect of financial incentives on linkage to care at 6 weeks among men and women**

297 Using individual clinical records ascertained from 17 clinics within the surveillance area, we  
298 confirmed that a total of 95 men initiated ART or resumed care within 6 weeks after the home visit.  
299 Among the 126 men who received positive (n=122) or discordant (n=4) HIV diagnosis via home-based  
300 HIV testing, 29 initiated ART or resumed care within 6 weeks (13 in the financial incentive arms and  
301 16 in the non-financial incentive arms). Of 10,575 men who did not receive HBHCT, 1,166 were  
302 confirmed to be on ART, and 446 had interrupted care at the time of study visit. Among those who  
303 had interrupted care, 66 resumed care within 6 weeks (14 in the financial incentives and 52 in the non-

304 financial incentive arms). In the ITT analysis, overall, 0.58% (27/4624) in the financial incentive arms  
305 and 0.73% (68/9270) in the arms without the financial incentives linked to care within 6 weeks after  
306 the home visit. The probability of linkage to care within 6 weeks did not differ significantly between  
307 the arms among men (aRR=0.78, 95% CI: 0.51-1.21).

308

309 On the other hand, a total of 198 women initiated ART or resumed care within 6 weeks after the home  
310 visit. Of the 395 women who received positive (n=375) or discordant (n=20) HIV diagnosis via home-  
311 based HIV testing, 77 initiated ART or resumed care within 6 weeks (45 in the financial incentive  
312 arms and 32 in the non-financial incentive arms). Among the 11,976 women who did not receive  
313 HBHCT, 2,743 were confirmed to be on ART, and 856 had interrupted care at the time of study visit.  
314 Among those with interrupted care, 121 resumed care within 6 weeks (38 in the financial incentives  
315 and 83 in the non-financial incentive arms). In the ITT analysis, 1.29% (83/6433) in the financial  
316 incentive arms and 0.85% (115/13451) in the arms without financial incentives linked to care within  
317 6 weeks after the home visit. The probability of linkage to care within 6 weeks was significantly higher  
318 in the financial incentive arms among women (aRR=1.50, 95% CI:1.03–2.21, p=0.04).

319

320 The probability of linkage to care up to 1 year among men still did not differ in the financial incentive  
321 and non-financial incentive arms (Figure S2). As anticipated, among women, there was no additional  
322 gain in linkage to care up to 1 year in the financial incentive arms beyond the eligibility period of 6  
323 weeks to receive the second financial incentive.

324

## 325 **DISCUSSION**

326 In this study, we found that the small once-off financial incentive did not significantly improve linkage  
327 to care within the voucher eligibility period of 6 weeks in men whilst it substantially increased linkage  
328 to care by 47% among women. The provision of an immediate and tangible benefit via a financial  
329 incentive effectively reached those at higher risk, yielding a three-fold increase in HIV-positive  
330 diagnoses among both men and women. However, men encounter greater barriers in accessing care at

331 clinics due to masculine norms, stigma, concerns about confidentiality, or the necessity to prioritize  
332 work over clinic visits, often resulting in delays in linking to care.<sup>41,16,19</sup> Our study finding suggests  
333 that the small once-off financial incentive is likely insufficient to overcome barriers that men face to  
334 link to care at clinics.

335

336 Several studies examined the efficacy of financial incentives on linkage to care and reported mixed  
337 results. In one study conducted in US metropolitan cities, financial incentives increased viral  
338 suppression and regular clinic attendance among men and women living with HIV but had no effect  
339 on linkage to care.<sup>26</sup> In Mozambique, when financial incentives were provided in addition to  
340 comprehensive intervention strategy including health messages and appointment reminders via SMS  
341 messaging, there was no additional benefit of financial incentives in linkage to care.<sup>25</sup>

342

343 In our study, only 22% of men and 20% of women who tested HIV-positive via HBHCT across the  
344 study arms linked to care within 6 weeks of HBHCT, similar to the findings from other trials in South  
345 Africa. In the universal ART trial conducted in the north of the surveillance site (ANRS 12249 TasP  
346 cluster-randomized trial), only 36.1% of those tested HIV-positive via HBCHT linked to care within  
347 3 months.<sup>42</sup> Similarly, in the HPTN 071 (PopART) trial, only 31% of men and 34% of women  
348 diagnosed with HIV through HBHCT successfully linked to care within 3 months in South Africa.<sup>17</sup>  
349 However, in Zimbabwe, when patients diagnosed with HIV at home were escorted to visit a clinic and  
350 link to care, over 85% successfully linked to care within just 30 days of HIV diagnosis.<sup>43</sup> Similarly, in  
351 Botswana, facilitated and active linkage to care for HIV-positive individuals who were not receiving  
352 ART reduced the time to ART initiation by 81%, compared to the standard of care.<sup>44</sup> Addressing the  
353 challenge of linkage to care, especially among men, would require a multitude of interventions  
354 simultaneously.

355

356 This study was conducted as a community-randomized clinical trial encompassing over 30,000  
357 individuals nested within the ongoing population-based HIV surveillance. However, the overall

358 population coverage of a once-off round of home-based HIV testing during the trial was relatively low  
359 at 21%, and as would be expected the HIV prevalence among those consenting to rapid-test for HIV  
360 was lower than the observed population prevalence in the communities. These led to a comparatively  
361 lower number of individuals who were eligible for linkage to care for ART initiation or re-engagement.  
362 Lastly, the intervention was delivered in a single round and might not be sustainable for routine  
363 implementation on a large scale. Policymakers might consider tailoring it for specific populations or  
364 settings in light of other competing interventions to optimize HIV response and treatment.

365

## 366 **CONCLUSION**

367 In this cluster-randomized clinical trial, we found that during a single round of interventions to improve  
368 linkage to care, a small once-off financial incentive did not increase linkage to care among men during  
369 the eligibility period of 6 weeks. However, the provision of a small financial incentive significantly  
370 improved linkage to care among women during the same time period.

371

372 **REFERENCES**

- 373 1. Joint United Nations Programme on HIV/AIDS (UNAIDS). Understanding fast-track: accelerating  
374 action to end the AIDS epidemic by 2030. Geneva, Switzerland: UNAIDS; 2015.
- 375 2. Cohen MS, Chen YQ, McCauley M, Gamble T, Hosseinipour MC, Kumarasamy N, et al. Prevention of  
376 HIV-1 infection with early antiretroviral therapy. *N Engl J Med*. 2011 Aug 11;365(6):493–505.
- 377 3. Cohen MS, Chen YQ, McCauley M, Gamble T, Hosseinipour MC, Kumarasamy N, et al. Antiretroviral  
378 Therapy for the Prevention of HIV-1 Transmission. *New England Journal of Medicine*. 2016 Sep  
379 1;375(9):830–9.
- 380 4. Rodger AJ, Cambiano V, Bruun T, Vernazza P, Collins S, van Lunzen J, et al. Sexual Activity Without  
381 Condoms and Risk of HIV Transmission in Serodifferent Couples When the HIV-Positive Partner Is  
382 Using Suppressive Antiretroviral Therapy. *JAMA*. 2016 Jul 12;316(2):171–81.
- 383 5. Tanser F, Barnighausen T, Grapsa E, Zaidi J, Newell ML. High coverage of ART associated with  
384 decline in risk of HIV acquisition in rural KwaZulu-Natal, South Africa. *Science*. 2013 Feb  
385 22;339(6122):966–71.
- 386 6. Vandormael A, Akullian A, Siedner M, Bärnighausen T, de Oliveira T, Tanser F. Declines in HIV  
387 incidence among men and women in a South African population-based cohort. *Nature Communications*.  
388 2019;10(1):5482.
- 389 7. Tanser F, Kim HY, Vandormael A, Iwuji C, Bärnighausen T. Opportunities and challenges in HIV  
390 treatment as prevention research: results from the ANRS 12249 cluster-randomized trial and associated  
391 population cohort. *Current HIV/AIDS Reports*. 2020;1–12.
- 392 8. Joint United Nations Programme on HIV/AIDS (UNAIDS). UNAIDS Data 2022. 2023.
- 393 9. Labhardt ND, Motlomelo M, Cerutti B, Pfeiffer K, Kamele M, Hobbins MA, et al. Home-Based Versus  
394 Mobile Clinic HIV Testing and Counseling in Rural Lesotho: A Cluster-Randomized Trial. Pant Pai N,  
395 editor. *PLoS Medicine*. 2014 Dec;11(12):e1001768–e1001768.
- 396 10. Iwuji CC, Orne-Gliemann J, Larmarange J, Okesola N, Tanser F, Thiebaut R, et al. Uptake of Home-  
397 Based HIV Testing, Linkage to Care, and Community Attitudes about ART in Rural KwaZulu-Natal,  
398 South Africa: Descriptive Results from the First Phase of the ANRS 12249 TasP Cluster-Randomised  
399 Trial. Low N, editor. *PLOS Medicine*. 2016 Aug;13(8):e1002107–e1002107.
- 400 11. Doherty T, Tabana H, Jackson D, Naik R, Zembe W, Lombard C, et al. Effect of home based HIV  
401 counselling and testing intervention in rural South Africa: cluster randomised trial. *BMJ*. 2013;
- 402 12. Dalal W, Feikin DR, Amolloh M, Ransom R, Burke H, Lugalia F, et al. Home-based HIV testing and  
403 counseling in rural and urban Kenyan communities. *J Acquir Immune Defic Syndr*. 2013 Feb  
404 1;62(2):e47–54.
- 405 13. van Rooyen H, Barnabas RV, Baeten JM, Phakathi Z, Joseph P, Krows M, et al. High HIV testing  
406 uptake and linkage to care in a novel program of home based HIV counseling and testing with  
407 facilitated referral in KwaZulu-Natal, South Africa. *J Acquir Immune Defic Syndr*. 2013 Sep  
408 1;64(1):e1–8.
- 409 14. Sabapathy K, Van den Bergh R, Fidler S, Hayes R, Ford N. Uptake of Home-Based Voluntary HIV  
410 Testing in Sub-Saharan Africa: A Systematic Review and Meta-Analysis. Sansom SL, editor. *PLoS*  
411 *Medicine*. 2012 Dec;9(12):e1001351–e1001351.
- 412 15. Baisley KJ, Seeley J, Siedner MJM, Koole K, Matthews P, Tanser F, et al. Findings from home-based  
413 HIV testing and facilitated linkage after scale-up of test and treat in rural South Africa: young people  
414 still missing. *HIV Medicine*. 2019 Nov;20(10):704–8.



- 415 16. Maughan-Brown B, Beckett S, Kharsany ABM, Cawood C, Khanyile D, Lewis L, et al. Poor rates of  
416 linkage to HIV care and uptake of treatment after home-based HIV testing among newly diagnosed 15-  
417 to-49 year-old men and women in a high HIV prevalence setting in South Africa. *AIDS Care*. 2021  
418 Jan;33(1):70–9.
- 419 17. Seeley J, Bond V, Yang B, Floyd S, MacLeod D, Viljoen L, et al. Understanding the Time Needed to  
420 Link to Care and Start ART in Seven HPTN 071 (PopART) Study Communities in Zambia and South  
421 Africa. *AIDS and Behavior*. 2019 Apr;23(4):929–46.
- 422 18. Treves-Kagan S, Steward WT, Ntswane L, Haller R, Gilvydis JM, Gulati H, et al. Why increasing  
423 availability of ART is not enough: a rapid, community-based study on how HIV-related stigma impacts  
424 engagement to care in rural South Africa. *BMC Public Health*. 2016 Jan 28;16:87.
- 425 19. Maughan-Brown B, Harrison A, Galárraga O, Kuo C, Smith P, Bekker LG, et al. Factors affecting  
426 linkage to HIV care and ART initiation following referral for ART by a mobile health clinic in South  
427 Africa: evidence from a multimethod study. *J Behav Med*. 2019 Oct;42(5):883–97.
- 428 20. Kelly N, Maokola W, Mudasiru O, McCoy SI. Interventions to Improve Linkage to HIV Care in the Era  
429 of “Treat All” in Sub-Saharan Africa: a Systematic Review. *Current HIV/AIDS Reports*. 2019  
430 Aug;16(4):292–303.
- 431 21. Bassett IV, Wilson D, Taaffe J, Freedberg KA. Financial incentives to improve progression through the  
432 HIV treatment cascade. *Current opinion in HIV and AIDS*. 2015 Nov;10(6):451–63.
- 433 22. Choko AT, Corbett EL, Stallard N, Maheswaran H, Lepine A, Johnson CC, et al. HIV self-testing alone  
434 or with additional interventions, including financial incentives, and linkage to care or prevention among  
435 male partners of antenatal care clinic attendees in Malawi: An adaptive multi-arm, multi-stage cluster  
436 randomised trial. Geng EH, editor. *PLoS Medicine*. 2019 Jan 2;16(1):e1002719.
- 437 23. Kranzer K, Simms V, Bandason T, Dauya E, McHugh G, Munyati S, et al. Economic incentives for HIV  
438 testing by adolescents in Zimbabwe: a randomised controlled trial. *The lancet HIV*. 2018;5(2):e79–86.
- 439 24. McNairy ML, Lamb MR, Gachuhi AB, Nuwagaba-Biribonwoha H, Burke S, Mazibuko S, et al.  
440 Effectiveness of a combination strategy for linkage and retention in adult HIV care in Swaziland: The  
441 Link4Health cluster randomized trial. *PLoS Medicine*. 2017 Nov 1;14(11).
- 442 25. Elul B, Lamb MR, Lahuerta M, Abacassamo F, Ahoua L, Kujawski SA, et al. A combination  
443 intervention strategy to improve linkage to and retention in HIV care following diagnosis in  
444 Mozambique: A cluster-randomized study. Lewin SR, editor. *PLOS Medicine*. 2017 Nov  
445 14;14(11):e1002433.
- 446 26. El-Sadr WM, Donnell D, Beauchamp G, Hall HI, Torian L V., Zingman B, et al. Financial Incentives  
447 for Linkage to Care and Viral Suppression Among HIV-Positive Patients. *JAMA Internal Medicine*.  
448 2017 Aug 1;177(8):1083.
- 449 27. Adamson B, El-Sadr W, Dimitrov D, Gamble T, Beauchamp G, Carlson JJ, et al. The Cost-  
450 Effectiveness of Financial Incentives for Viral Suppression: HPTN 065 Study. *Value in health*. 2019  
451 Feb;22(2):194–202.
- 452 28. Maughan-Brown B, Smith P, Kuo C, Harrison A, Lurie MN, Bekker LG, et al. A Conditional Economic  
453 Incentive Fails to Improve Linkage to Care and Antiretroviral Therapy Initiation Among HIV-Positive  
454 Adults in Cape Town, South Africa. *AIDS patient care and STDs*. 2018 Feb;32(2):70–8.
- 455 29. Galarraga O, Sosa-Rubi SG, Kuo C, Gozalo P, Gonzalez A, Saavedra B, et al. Punto Seguro: A  
456 Randomized Controlled Pilot Using Conditional Economic Incentives to Reduce Sexually Transmitted  
457 Infection Risks in Mexico. *AIDS and behavior*. 2017 Dec;21(12):3440–56.

- 458 30. Hoffmann CJ, Mabuto T, Ginindza S, Fielding KL, Kubeka G, Dowdy DW, et al. Strategies to  
459 Accelerate HIV Care and Antiretroviral Therapy Initiation After HIV Diagnosis: A Randomized Trial. *J*  
460 *Acquir Immune Defic Syndr*. 2017 Aug 15;75(5):540–7.
- 461 31. Tanser FC, Kim HY, Mathenjwa T, Shahmanesh M, Seeley J, Matthews P, et al. Home-Based  
462 Intervention to Test and Start (HITS): a community-randomized controlled trial to increase HIV testing  
463 uptake among men in rural South Africa. *Journal of the International AIDS Society*. 2021  
464 Feb;24(2):e25665.
- 465 32. Inghels M, Kim HY, Mathenjwa T, Shahmanesh M, Seeley J, Wyke S, et al. Can a conditional financial  
466 incentive (CFI) reduce socio-demographic inequalities in home-based HIV testing uptake? A secondary  
467 analysis of the HITS clinical trial intervention in rural South Africa. *Social Science & Medicine*.  
468 2022;311:115305.
- 469 33. Gareta D, Baisley K, Mngomezulu T, Smit T, Khoza T, Nxumalo S, et al. Cohort Profile Update: Africa  
470 Centre Demographic Information System (ACDIS) and population-based HIV survey. *International*  
471 *Journal of Epidemiology*. 2021 Feb 1;50(1):33–4.
- 472 34. Tanser F, Hosegood V, Bärnighausen T, Herbst K, Nyirenda M, Muhwava W, et al. Cohort Profile:  
473 Africa Centre Demographic Information System (ACDIS) and population-based HIV survey.  
474 *International journal of epidemiology*. 2008 Oct;37(5):956–62.
- 475 35. Muhwava W, Nyirenda M, Mutevedzi T, Herbst A, Hosegood V. Operational and Methodological  
476 Procedures of the Africa Centre Demographic Information System. 2007.
- 477 36. Mathenjwa T, Kim HY, Zuma T, Shahmanesh M, Seeley J, Matthews P, et al. Home-based intervention  
478 to test and start (HITS) protocol: a cluster-randomized controlled trial to reduce HIV-related mortality in  
479 men and HIV incidence in women through increased coverage of HIV treatment. *BMC Public Health*.  
480 2019 Dec 19;19(1):969.
- 481 37. Adeagbo O, Tanser F, Gumede V, Mathenjwa T, Matthews P, Wyke S, et al. A Process Evaluation of an  
482 Incentivised Home-based Intervention to Test and Start (HITS) in an HIV Hyperendemic setting in rural  
483 KwaZulu-Natal, South Africa. *Sexually Transmitted Infections*. 2019;95(Suppl 1).
- 484 38. Mathenjwa T, Bain LE, Adeagbo O, Kim HY, Inghels M, Zuma T, et al. Increasing HIV testing and  
485 linkage to care among men in rural South Africa using conditional financial incentives and a decision  
486 support app: a process evaluation. Submitted.
- 487 39. Mathenjwa T, Adeagbo O, Zuma T, Dikgale K, Zeitlin A, Matthews P, et al. Development and  
488 Acceptability of a Tablet-Based App to Support Men to Link to HIV Care: Mixed Methods Approach.  
489 *JMIR mHealth and uHealth*. 2020 Nov 24;8(11):e17549.
- 490 40. Osler M, Hilderbrand K, Hennessey C, Arendse J, Goemaere E, Ford N, et al. A three-tier framework  
491 for monitoring antiretroviral therapy in high HIV burden settings. *Journal of the International AIDS*  
492 *Society*. 2014;17(1):18908.
- 493 41. Hlongwa M, Jama NA, Mehlomakulu V, Pass D, Basera W, Nicol E. Barriers and Facilitating Factors to  
494 HIV Treatment Among Men in a High-HIV-Burdened District in KwaZulu-Natal, South Africa: A  
495 Qualitative Study. *Am J Mens Health*. 2022 Sep 6;16(5):15579883221120987.
- 496 42. Gosset A, Protopopescu C, Larmarange J, Orne-Gliemann J, McGrath N, Pillay D, et al. Retention in  
497 care trajectories of HIV-positive individuals participating in a universal test-and-treat program in rural  
498 South Africa (ANRS 12249 TasP Trial). *Journal of Acquired Immune Deficiency Syndromes*. 2019  
499 Apr;80(4):375–85.
- 500 43. Tafuma TA, Mahachi N, Dziwa C, Marowa P, Moga T, Chimbidzikai T, et al. Time taken to link newly  
501 identified HIV positive clients to care following a home-base index case HIV testing: Experience from

502 two provinces in Zimbabwe. PLoS ONE [Internet]. 2018 Aug;13(8). Available from:  
503 /pmc/articles/PMC6104920/

504 44. Makhema J, Wirth KE, Pretorius Holme M, Gaolathe T, Mmalane M, Kadima E, et al. Universal  
505 Testing, Expanded Treatment, and Incidence of HIV Infection in Botswana. *New England Journal of*  
506 *Medicine*. 2019 Jul;381(3):230–42.

507

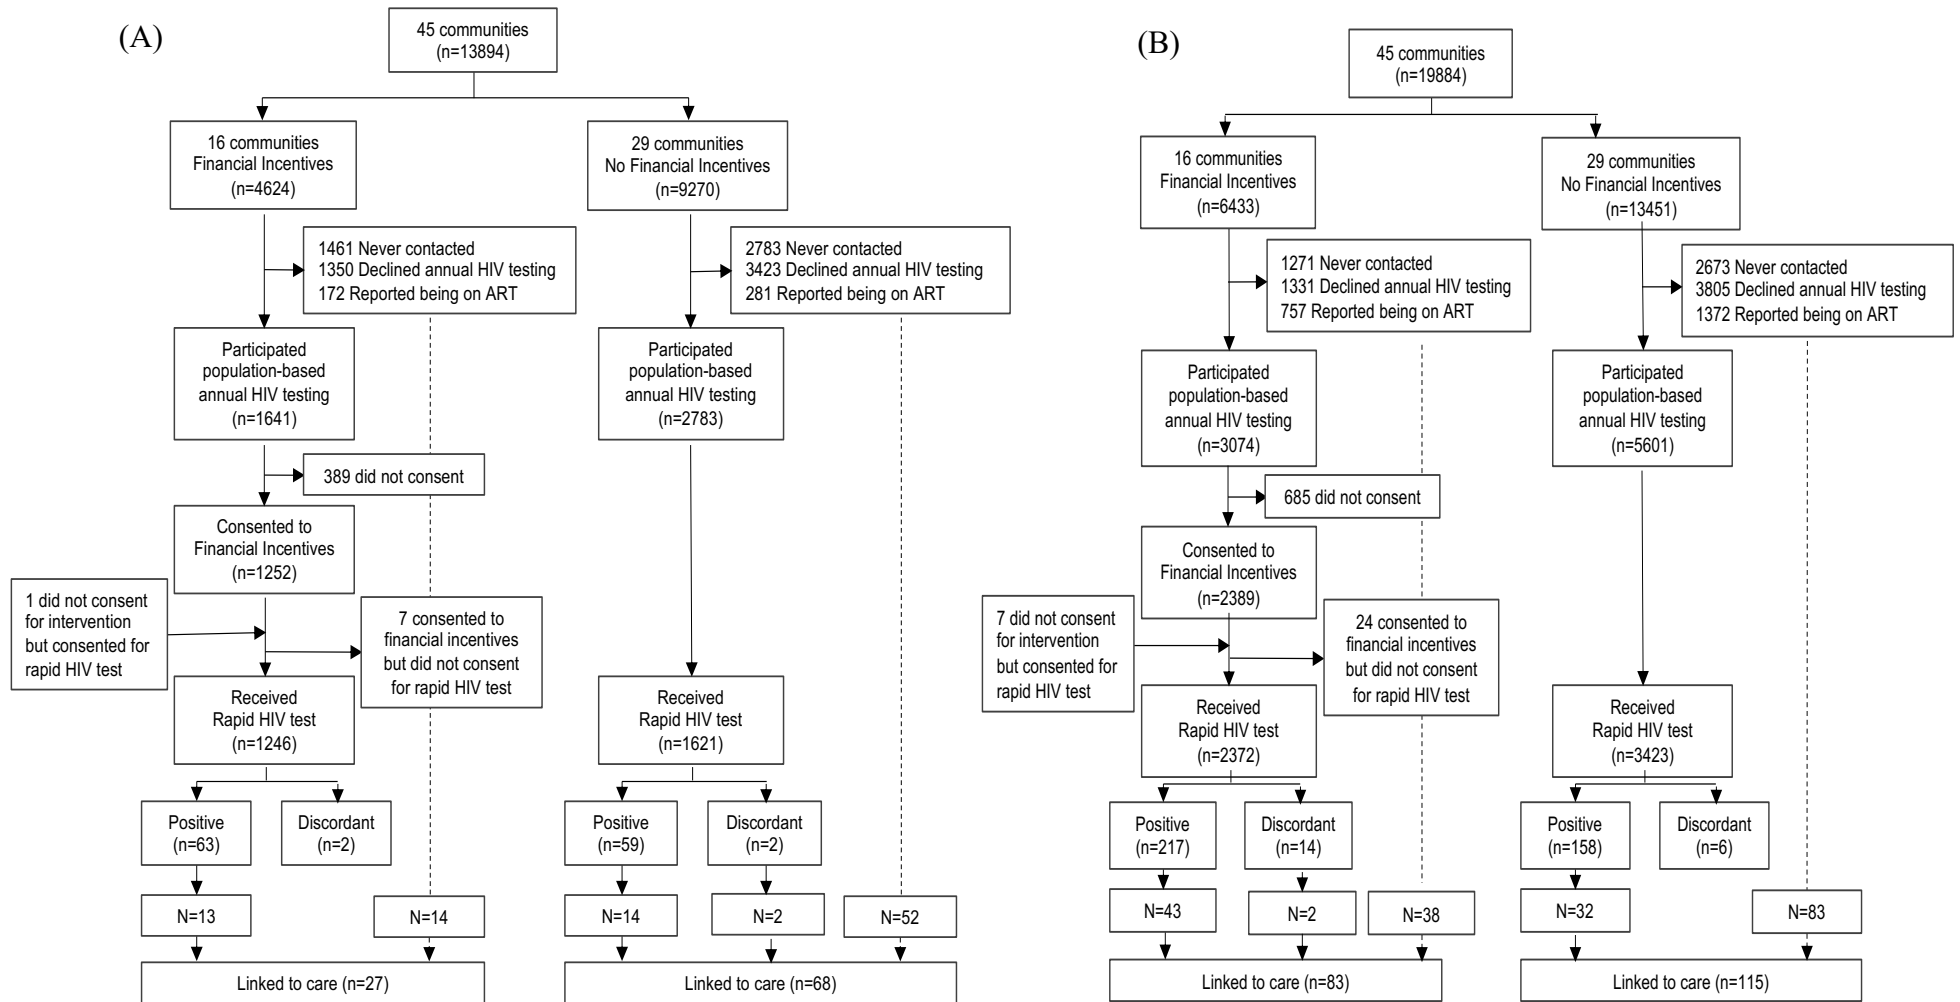

**Figure 1.** Flow diagram for the HITS cluster-randomized controlled trial and linkage to care within the voucher eligibility period of 6 weeks of a home visit among (A) men and (B) women. Flow diagram shows individual flow through each stage of the HITS trial in the arms with and without financial incentives. The dashed line indicates linkage to care within 6 weeks among those who were never contacted, declined annual HIV testing, or did not consent for interventions.

**Figure 2. Kaplan Meir curves for linkage to HIV care by the voucher eligibility period of 6 weeks after the home-based study visit among (A) men and (B) women. The solid black lines represent the arms without financial incentives, and the dashed blue lines the financial incentive arms.**

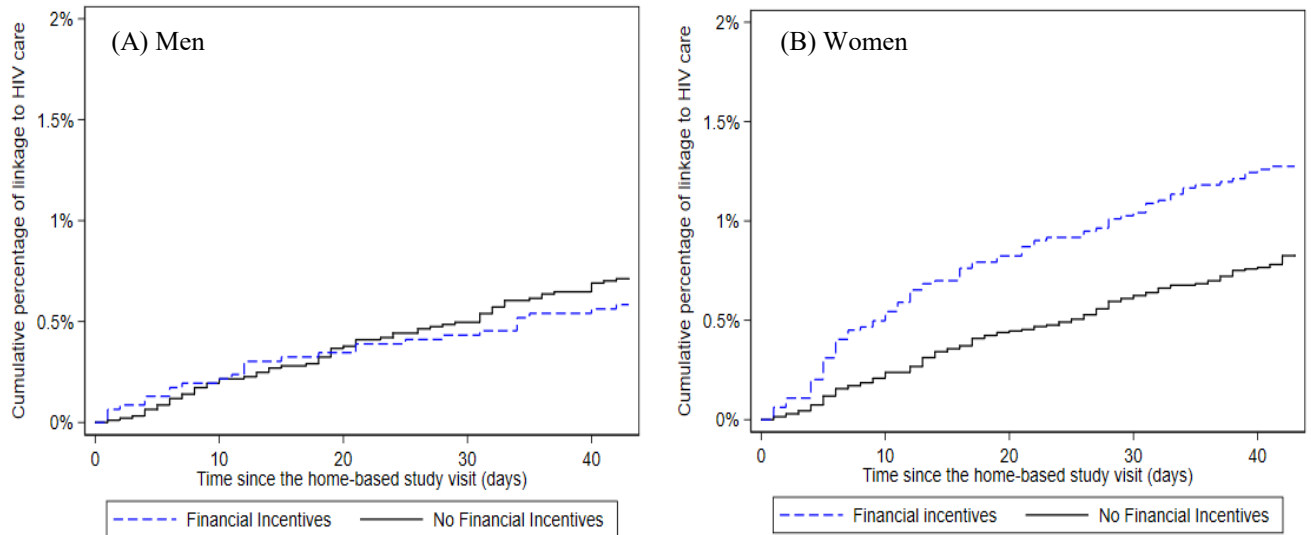

**Table 1. Baseline characteristics of communities and individuals among men and women in the arms with and without financial incentives**

| Characteristic                                                       | (a) Men              |                         | (b) Women            |                         |
|----------------------------------------------------------------------|----------------------|-------------------------|----------------------|-------------------------|
|                                                                      | Financial Incentives | No Financial Incentives | Financial Incentives | No Financial Incentives |
| <b><i>Community-level factor</i></b>                                 | <b>n=16</b>          | <b>n=29</b>             | <b>n=16</b>          | <b>n=29</b>             |
| HIV prevalence in 2018, % (95% CI)*                                  | 18.5 (15.9-21.3)     | 15.0 (12.4-17.9)        | 33.8 (31.4-36.2)     | 32.5 (31.1-34.0)        |
| <b><i>Individual-level factors</i></b>                               | <b>n=4624</b>        | <b>n=9270</b>           | <b>n=6433</b>        | <b>n=13451</b>          |
| Time since last HIV test in the surveillance (years), median (IQR)** | 2.5 (0.6, 6.0)       | 2.3 (1.0, 5.3)          | 0.97 (0.94, 1.02)    | 0.97 (0.95, 1.04)       |
| <b>Age (years), n (%)</b>                                            |                      |                         |                      |                         |
| 15-25                                                                | 1712 (37.1)          | 3397 (36.7)             | 1608 (25.0)          | 3333 (24.8)             |
| 25-35                                                                | 1063 (23.0)          | 2140 (23.1)             | 1362 (21.2)          | 2862 (21.3)             |
| 35-45                                                                | 707 (15.3)           | 1461 (15.8)             | 1050 (16.4)          | 2124 (15.8)             |
| 45-55                                                                | 472 (10.2)           | 898 (9.7)               | 862 (13.4)           | 1780 (13.2)             |
| ≥55                                                                  | 663 (14.4)           | 1356 (14.7)             | 1538 (24.0)          | 3336 (24.8)             |
| <b>Marital Status, n (%)</b>                                         |                      |                         |                      |                         |
| Never married                                                        | 1223 (26.4)          | 2449 (26.4)             | 1313 (20.4)          | 2637 (19.6)             |
| Married                                                              | 665 (14.4)           | 1355 (14.6)             | 930 (14.5)           | 1890 (14.1)             |
| Informal Union                                                       | 1818 (39.3)          | 3566 (38.5)             | 2524 (39.2)          | 5289 (39.3)             |
| Separated/Divorced/Widowed                                           | 76 (1.6)             | 176 (1.9)               | 875 (13.6)           | 1947 (14.5)             |
| Don't know/Missing                                                   | 842 (18.2)           | 1724 (18.6)             | 791 (12.3)           | 1688 (12.5)             |
| <b>Education, n (%)</b>                                              |                      |                         |                      |                         |
| No formal education                                                  | 999 (21.6)           | 2024 (21.8)             | 1317 (20.5)          | 2789 (20.7)             |
| Primary (grade 1-7)                                                  | 249 (5.4)            | 504 (5.4)               | 550 (8.5)            | 1215 (9.0)              |
| Secondary+ (≥ grade 8)                                               | 2739 (59.2)          | 5362 (57.8)             | 3765 (58.5)          | 7675 (57.1)             |
| Don't know/Missing                                                   | 637 (13.8)           | 1380 (14.9)             | 801 (12.5)           | 1772 (13.2)             |
| <b>Area of residency, n (%)</b>                                      |                      |                         |                      |                         |
| Rural                                                                | 2607 (56.4)          | 5434 (58.6)             | 3751 (58.3)          | 8029 (59.7)             |
| Peri-urban                                                           | 1831 (39.6)          | 2975 (32.1)             | 2426 (37.7)          | 4053 (30.1)             |
| Urban                                                                | 186 (4.0)            | 861 (9.3)               | 256 (4.0)            | 1369 (10.2)             |

\*95% confidence intervals were calculated using the cumulative probabilities of the binomial distribution.

\*\*Data indicates the time since last HIV test among those who ever participated in the annual HIV surveillance, including 2,051 (44.4%) in the financial incentive arms and 4,052 (43.7%) in the non-financial incentive arms among men, and 5,908 (91.8%) in the financial incentive arms and 12,427 (92.4%) in the non-financial incentive arms among women. Abbreviation: IQR, Interquartile Range

**Table 2. Linkage to HIV care within the voucher eligibility period of 6 weeks among men and women in the arms with and without the financial incentives**

|                         | N     | Linked to HIV care within 6 weeks, n(%) | Risk Ratio* (95% CI) | p-value |
|-------------------------|-------|-----------------------------------------|----------------------|---------|
| <b>Men</b>              |       |                                         |                      |         |
| Financial incentives    | 4624  | 27 (0.58)                               | 0.78 (0.50-1.21)     | 0.27    |
| No financial incentives | 6746  | 68 (0.73)                               | Ref                  |         |
| <b>Women</b>            |       |                                         |                      |         |
| Financial incentives    | 6433  | 83 (1.29)                               | 1.50 (1.03-2.21)     | 0.04    |
| No financial incentives | 13451 | 115 (0.85)                              | Ref                  |         |

\*Risk ratio accounts for clustering within communities using a random-intercept log-Poisson regression with empirical standard error estimates. It was also adjusted for the provision of EPIC-HIV provided as part of the 2x2 cluster randomized trial design.

# Appendix

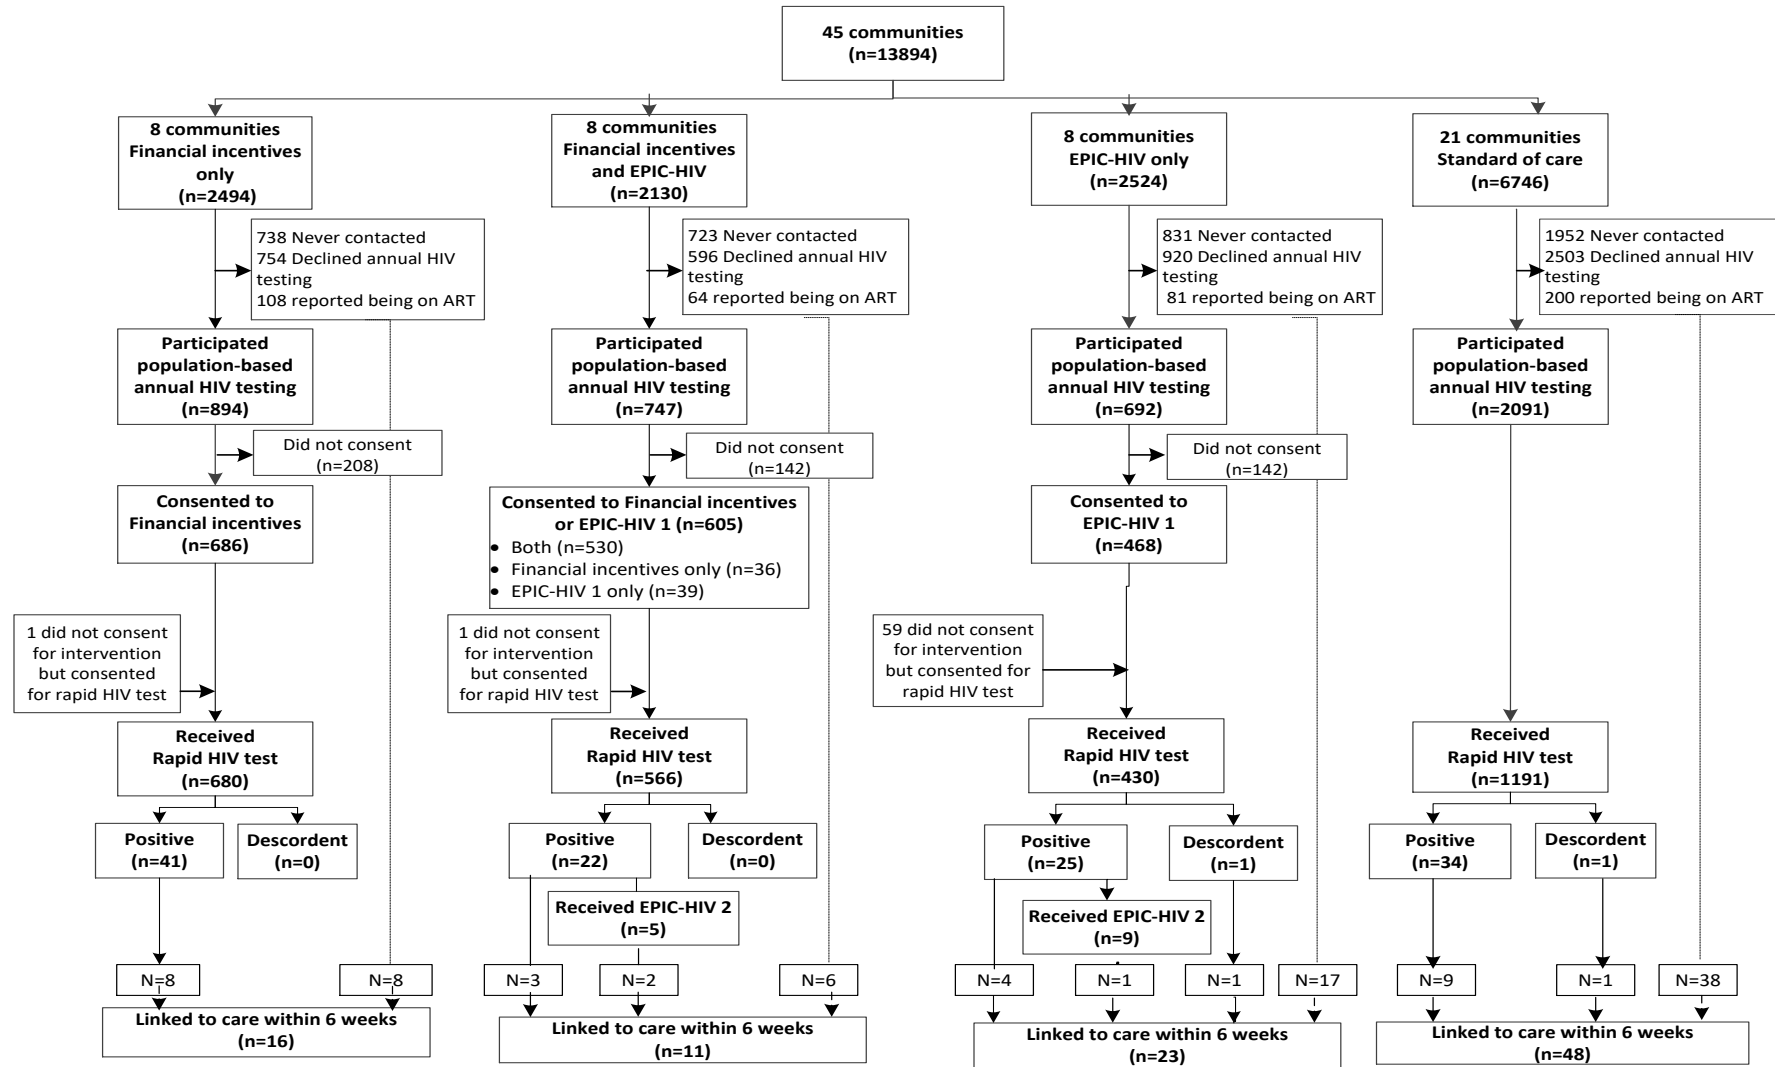



Figure S1. Flow diagram for the HITS cluster-randomized controlled trial and linkage to care within the voucher eligibility period of 6 weeks of a home visit among men. Flow diagram shows individual flow through each stage of the HITS trial by intervention arms. The dashed line indicates linkage to care within 6 weeks among those who were never contacted, declined annual HIV testing, or did not consent for interventions. Abbreviation: EPIC, Empowering People through Informed Choices for HIV.

(A) Men

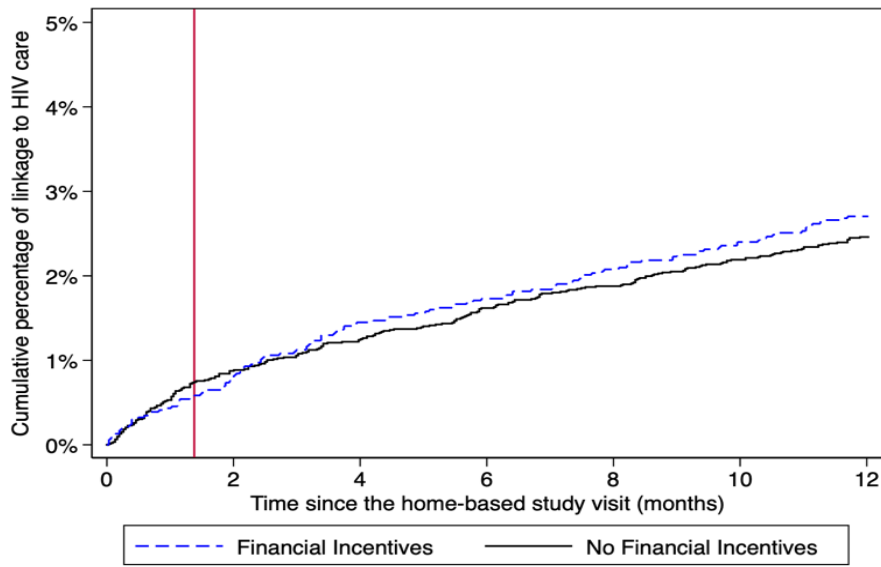

(B) Women

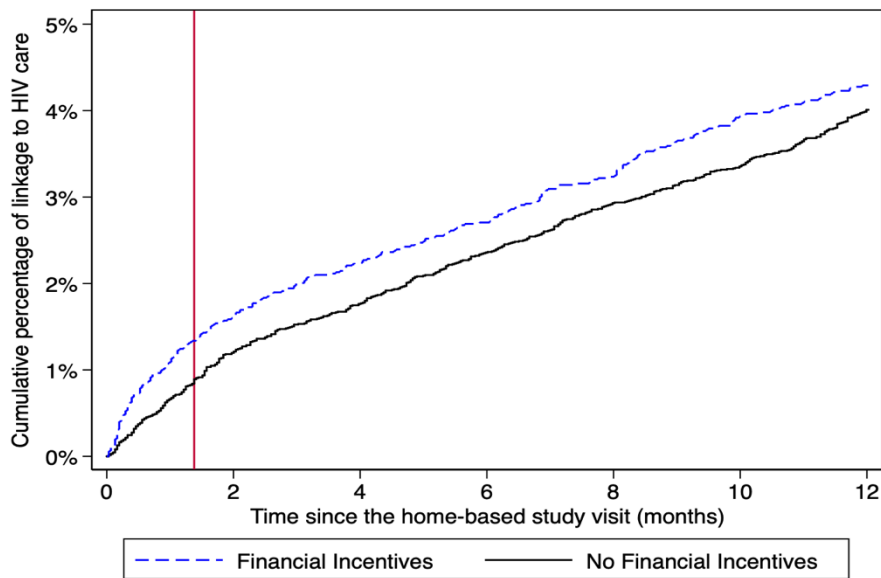

Figure S2. Kaplan Meier curves for linkage to HIV care by 1 year after the home-based study visit among (A) men and (B) women. The solid black lines represent the arms without financial incentives, and the dashed blue lines the financial incentive arms. The red line indicates the voucher eligibility period of 6 weeks to receive the second financial incentive when linked to care.
